# Supplementary material
Source: HighWire-hosted journal article supplement (https://www.annfammed.org/highwire/filestream/26718/field_highwire_adjunct_files/0/Wexler_visual_abstract.pdf)
Supplement: Wexler_visual_abstract.pdf [file Wexler_visual_abstract.pdf]

# A Qualitative Study of Primary Care Physicians' Approaches to Caring for Adult Adopted Patients

Results from in-depth interviews with 23 primary care physicians (PCPs), exploring their training and approaches to caring for adopted adults with limited family medical history (LFMH)

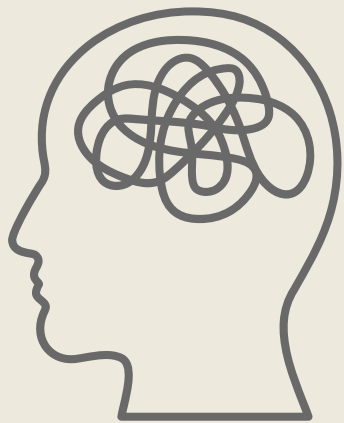

Mental illness and trauma are under-recognized and under-addressed.

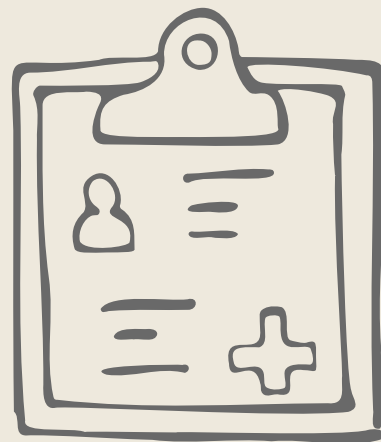

PCPs often obtain family medical history imprecisely, risking miscommunication and damage to the patient-physician relationship.

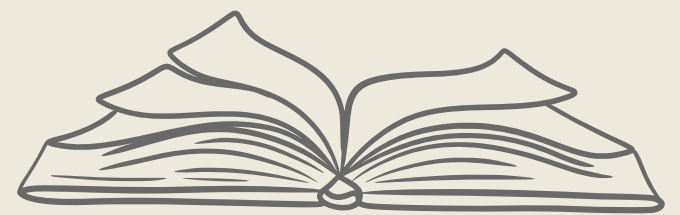

PCPs report knowledge gaps and receive little training or resources on adult adoptees with LFMH and want guidance around appropriate preventative screening and genetic testing.

*Source:* Wexler JH, Toll E, Goldman RE. A qualitative study of primary care physicians' approaches to caring for adult adopted patients. *Ann Fam Med*. 2025;23:10.1370/afm.240146
